# Supplementary material for: Tuning the In Vivo Photosynthetic Activity of Cyanobacteria’s Phycobilisome complex: A Spectroscopic Approach
Source: Research Square preprint supplement (doi:10.21203/rs.3.rs-6822772/v1), 2025-06-12
Supplement: Supplementary file 1 [file b2161b38ba9fc84b2fe92849.docx]

# **Tuning the *In Vivo* Photosynthetic Activity of Cyanobacteria’s Phycobilisome complex: A Spectroscopic Approach**

*Swapna Kalkar1, Jeffrey C. Ayerh1, Daniel Herr1*, Tetyana Ignatova1**

*1* University of North Carolina at Greensboro, Department of Nanoscience, Greensboro, NC, USA

*Corresponding authors:

Daniel Herr ( [0000-0001-7659-0869](https://orcid.org/0000-0001-7659-0869) ) [djherr@uncg.edu](mailto:djherr@uncg.edu)

Tetyana Ignatova ( [0000-0003-3859-6367](mailto:0000-0003-3859-6367) ) [t_ignato@uncg.edu](mailto:t_ignato@uncg.edu)

This document contains additional Figures and Tables to support information presented in main paper.


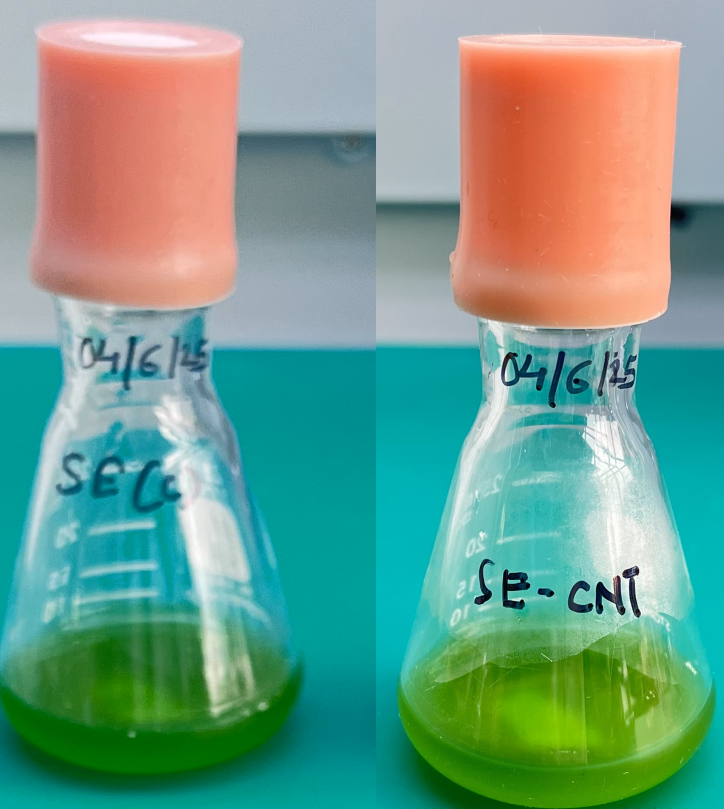


**Figure 1**:The standard growth of the bacteria for in vivo studies without any stress environment


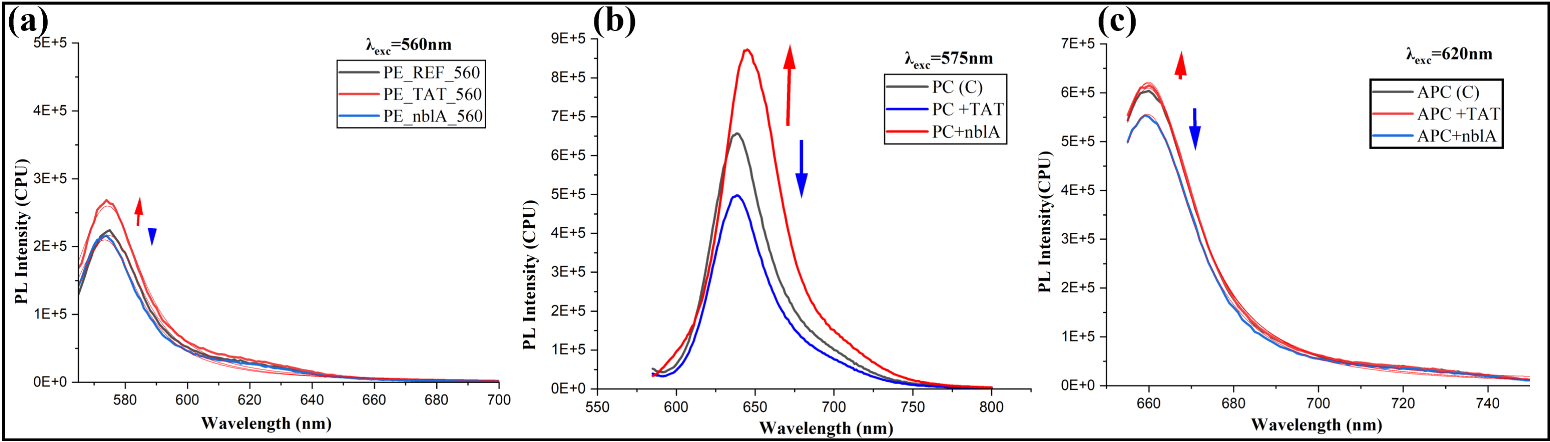


**Figure 2:** Spectra showing significant intensity change in commercial pigment’s fluorescence at (a)PE (λexc=560nm), (b)PC (λexc=575nm), and (c)APC (λexc=620nm) wavelengths when treated with only TAT and nblA peptide


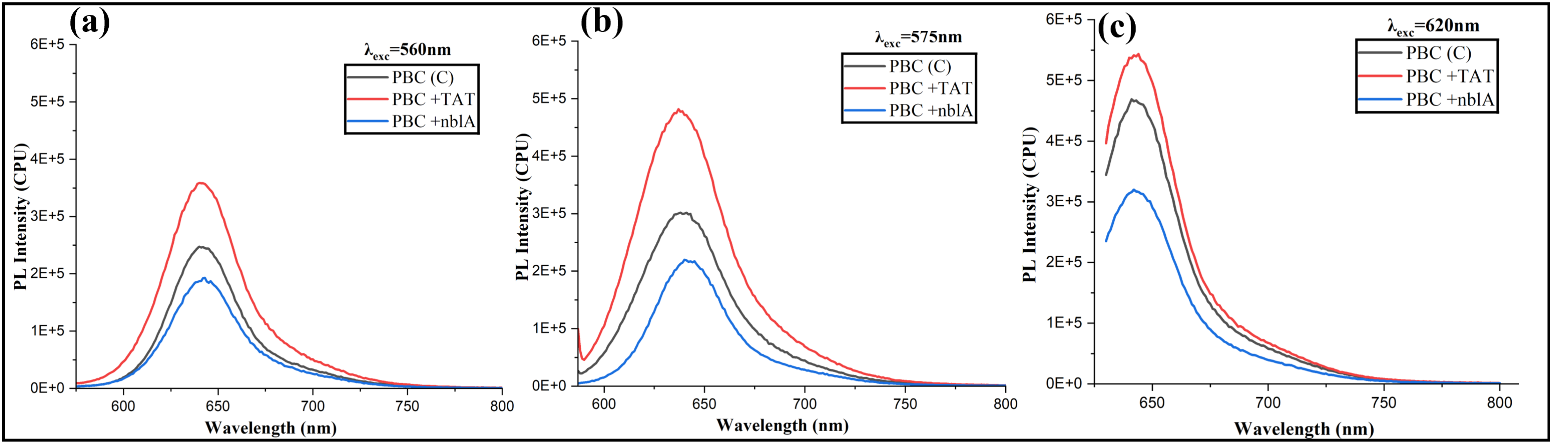


**Figure 3**:Spectra showing significant intensity change in PBC pigment’s photoluminescence at (a)PE (λexc=560nm), (b)PC (λexc=575nm), and (c)APC (λexc=620nm) wavelengths when treated with only TAT and nblA peptide


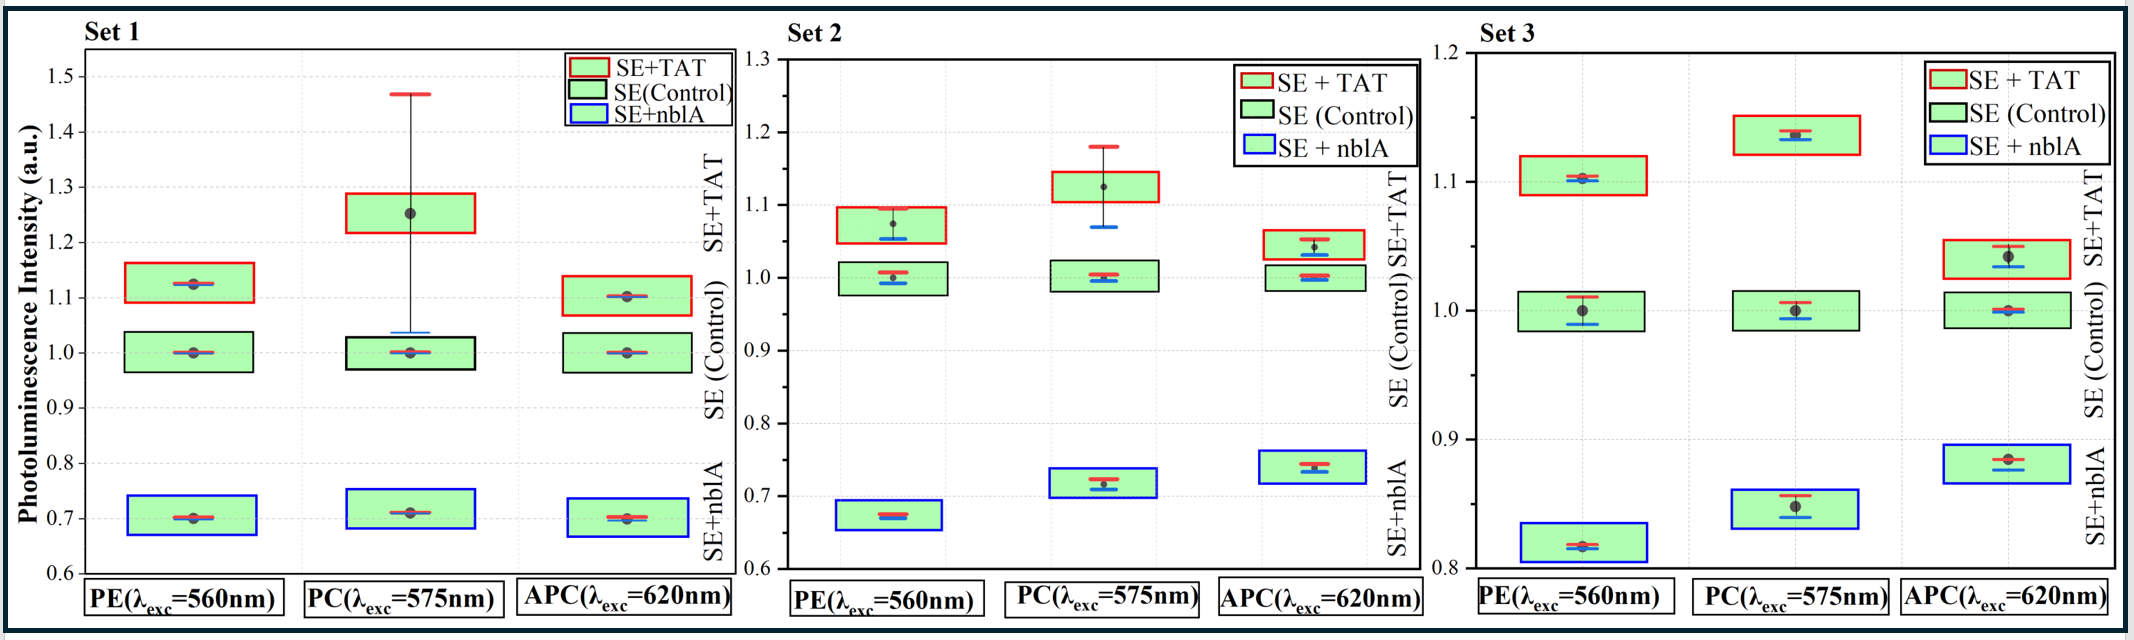


**Figure 4:** Comparison between 3 sets of in vivo studies showing degree of PL enhancement or quenching by interaction of CNT-TAT and CNT-nblA.


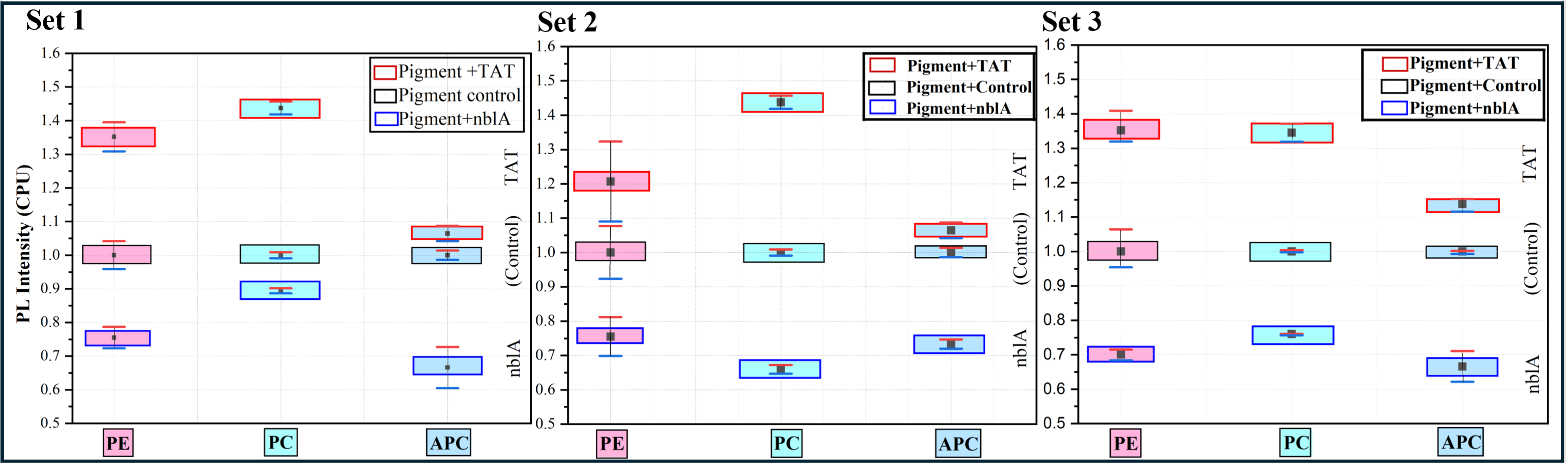


**Figure 5:** Comparison between 3 sets of in commercial pigments studies showing degree of PL enhancement or quenching by interaction of CNT-TAT and CNT-nblA


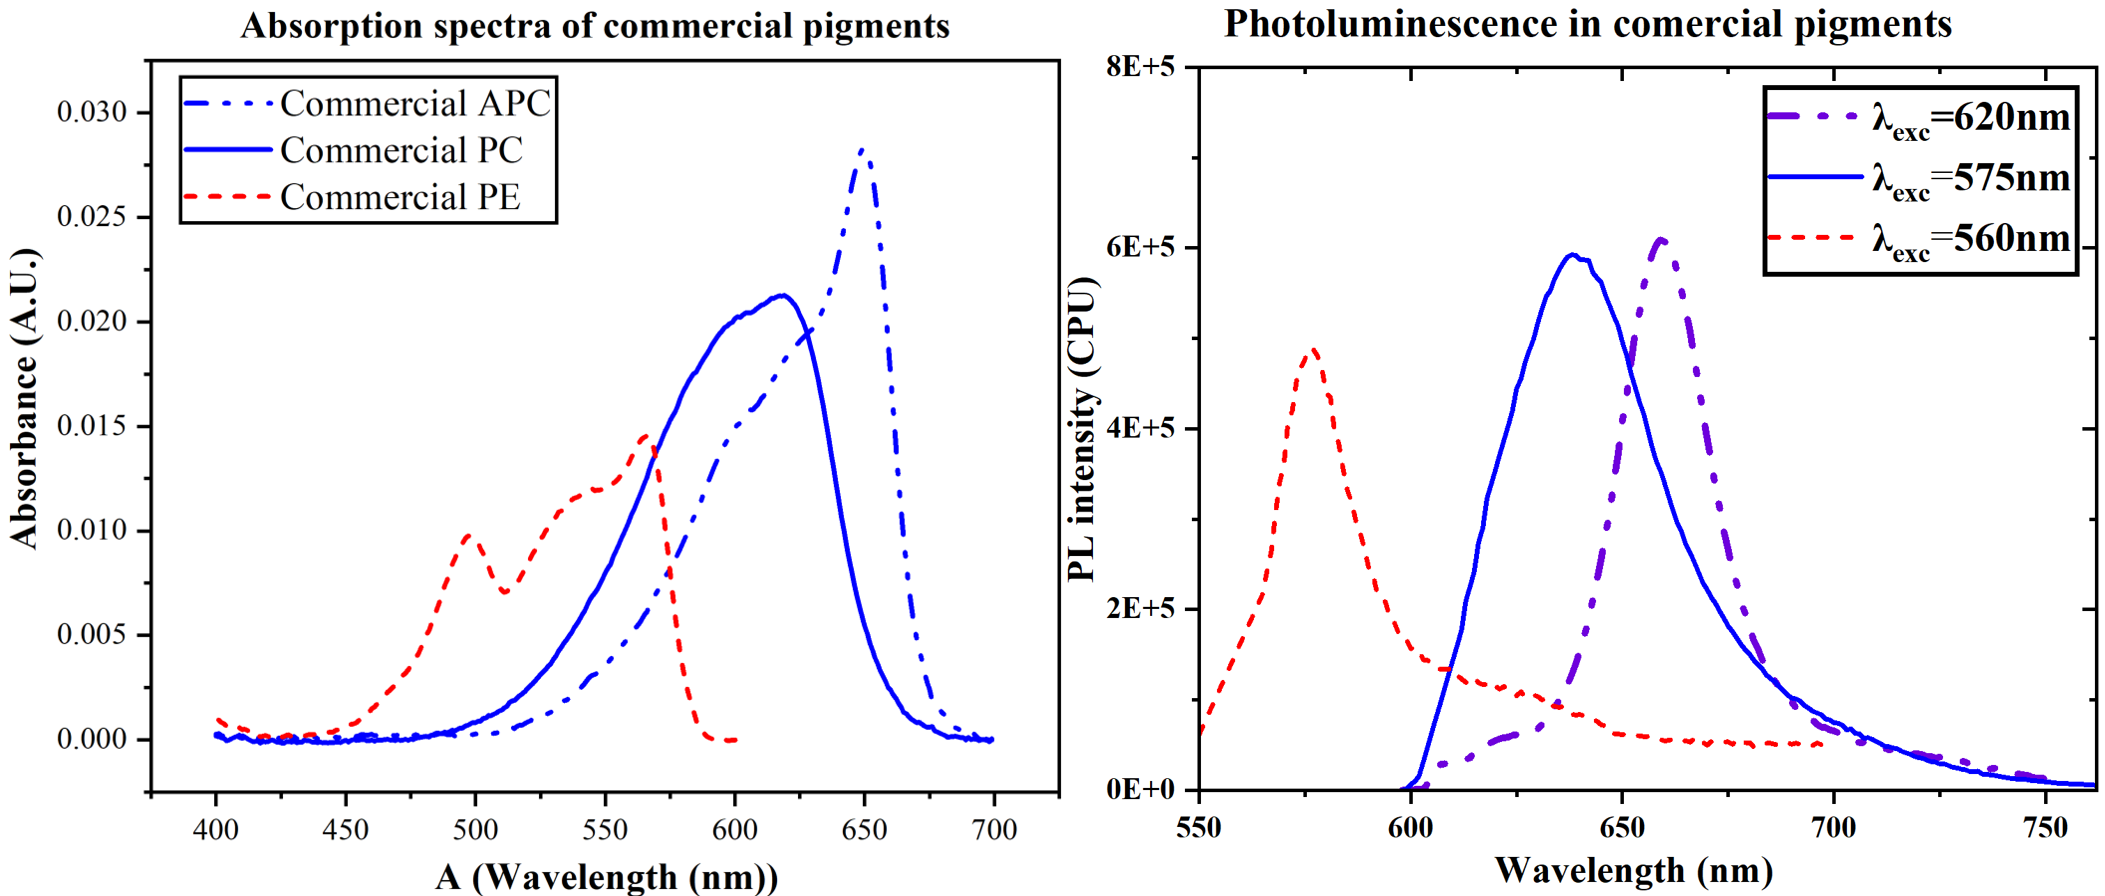


**Figure 6:**Absorption and photoluminescence of commercial pigments for calculation of quantum yield of reference pigments

Quantum yields of (Rhodamine 6G as a reference (Φ=95%)):

*,*

*, and*

respectively.

We confirmed reported values

**Table 1**: Summary of two-tailed p-values, based on two sample t-tests, that compare the observed *in vivo* PL of a given CNT-TAT and CNT-*nblA* hybrids with that for the pigment with only CNT, TAT or *nblA*.

**For PE pigment:**

| Nanomaterial/peptide | CNT | TAT | *nblA* |
| --- | --- | --- | --- |
| PE+CNT-TAT | 0.001 | 0.001 | - |
| PE+CNT- *nblA* | 0.062 | - | 0.000 |

**For PC pigment:**

| Nanomaterial/peptide | CNT | TAT | *nblA* |
| --- | --- | --- | --- |
| PC+CNT-TAT | 6.17E-06 | 0.000 | - |
| PC+CNT- *nblA* | 1.42E-05 | - | 5.73E-07 |

**For APC pigment:**

| Nanomaterial/peptide | CNT | TAT | *nblA* |
| --- | --- | --- | --- |
| PC+CNT-TAT | 5.94E-03 | 3.29E-03 | - |
| PC+CNT- *nblA* | 6.36E-05 | - | 1.18E-03 |
